# Supplementary material
Source: PubMed Central journal article supplement (PMC2951634)
Supplement: 97320630004396S1.pdf [file 97320630004396S1.pdf]

## Supplementary material:

**Table 1:** Result set obtained by Nearest Neighbor classifier

| Families           | Globin         | Homeobox | HSP | Kinase | Efficiency |
|--------------------|----------------|----------|-----|--------|------------|
| <b>Globin</b>      | 299            | 0        | 1   | 0      | 99.67%     |
| Homeobox           | 0              | 277      | 2   | 21     | 92.33%     |
| Heat Shock protein | 10             | 26       | 203 | 61     | 67.67%     |
| <b>Kinase</b>      | 3              | 2        | 55  | 240    | 80.00%     |
| <b>Efficiency</b>  | <b>84.92 %</b> |          |     |        |            |

After excluding kinase protein family we have the following results.

**Table 2:** Result set obtained by Nearest Neighbor classifier excluding kinase protein family

| Families           | Globin        | Homeobox | HSP | Efficiency |
|--------------------|---------------|----------|-----|------------|
| <b>Globin</b>      | 297           | 2        | 1   | 99.00%     |
| Homeobox           | 1             | 299      | 0   | 99.67%     |
| Heat Shock protein | 8             | 9        | 283 | 94.34%     |
| <b>Efficiency</b>  | <b>97.67%</b> |          |     |            |
